# Supplementary material
Source: Elsevier journal article supplement (https://www.sciencedirect.com/science/article/pii/S2341192917301087)
Supplement: mmc1 [file S2341192917301087:mmc1.pdf]

# Circuitos de Atención y tratamiento Postoperatorio para las patologías e intervenciones neuroquirúrgicas más prevalentes.

---

Encuesta realizada por la Sección de neurociencias de la SEDAR encaminada a conocer dos aspectos fundamentales en el postoperatorio inmediato de nuestros pacientes neuroquirúrgicos, dentro de la visión de cuidado perioperatorio de nuestra especialidad. Por una parte el "destino" de nuestros pacientes. En este epígrafe valoraremos el lugar de destino (físico), bajo que criterios, la existencia de protocolos que guíen nuestra decisión. Por otra parte, valoraremos los distintos modos de usar los tratamientos más habituales en nuestros pacientes.

## Hospital al que usted pertenece (Obligatorio)

---

## Dolor Postoperatorio

**1. ¿Se gradúa la intensidad de dolor mediante escalas (escala analógica visual (EVA), escala verbal numérica (EVN), otras) de forma sistemática?**

- ☐ Si
- ☐ No

**2. Clasifique el grado de dolor asociado a la craneotomía, según su opinión, dentro de la escala verbal numérica**

- ☐ Leve. (1-3).
- ☐ Moderado. (4-6).
- ☐ Severo. (>6)

**3 ¿Cuando se administra la primera dosis de analgésico postcraneotomía?**

*Si su respuesta es la cuatro indíquenos el periodo de tiempo en la siguiente pregunta*

- ☐ De forma inmediata al despertar.
- ☐ Cuando el paciente llega a la unidad postoperatoria receptora.
- ☐ Cuando es demandada por el paciente, si este está consciente.
- ☐ En un periodo de tiempo establecido por protocolo.

**4. Periodo de tiempo establecido por su protocolo para la primera dosis de analgésico postcraneotomía.** Solo conteste a esta pregunta si en la pregunta anterior su respuesta fue la última opción

---

**5. ¿Prescribe tratamiento de base frente al dolor post craneotomía o pauta según las demandas del paciente?**

- ☐ Tratamiento de base pautado.
- ☐ Tratamiento a demanda.
- ☐ Tratamiento de base mas tratamiento de rescate.
- ☐ AINES. (no metamizol magnésico)
- ☐ Paracetamol
- ☐ Tramadol
- ☐ Metamizol magnésico
- ☐ Codeína
- ☐ Morfina
- ☐ Metadona
- ☐ Otros: \_\_\_\_\_

**7. Tratamientos pautados frente al dolor postcraneotomía.**

Complete en la tabla con las siguientes condiciones: Si prescribe monoterapia, marque su elección en la fila de tratamiento de base monoterapia. Si prescribe de forma sistemática una asociación, marque el SEGUNDO fármaco en la fila de tratamiento combinado. Si prescribe tratamiento de base (monoterapia o combinado) y tratamiento de rescate, marque este ultimo en la TERCERA FILA.

|                                     | Tratamiento pautado de Base | Tratamiento de base pautado combinado | Tratamiento de rescate pautado |
|-------------------------------------|-----------------------------|---------------------------------------|--------------------------------|
| Paracetamol                         |                             |                                       |                                |
| AINES                               |                             |                                       |                                |
| Metamizol Magnesico                 |                             |                                       |                                |
| Tramadol                            |                             |                                       |                                |
| Codeína                             |                             |                                       |                                |
| metadona                            |                             |                                       |                                |
| Morfina PCA                         |                             |                                       |                                |
| Morfina en infusión continua no PCA |                             |                                       |                                |
| Fentanilo en infusión continua      |                             |                                       |                                |
| Fentanilo en bolos                  |                             |                                       |                                |
| otros                               |                             |                                       |                                |

**8. Si su respuesta ha sido "otros" especifíquelo.**

---

**9. ¿Realiza tratamiento preventivo, esto es, anterior a la incisión quirúrgica o a la colocación del craneostato además del que realiza vía intravenosa?**

- ☐ Si
- ☐ No

**10. ¿Qué tratamiento usa preferentemente?** Concrete en "otro" el tipo de tratamiento combinado que usa Bloqueos nerviosos tronculares (supraorbitario, supraciliar, auriculotemporal, cigomaticomalar...) realizados de forma previa al inicio)

- ☐ Infiltración de los puntos de fijación del craneostato
- ☐ Infiltración de la futura línea de incisión
- ☐ Combinación de las anteriores
- ☐ Otros: \_\_\_\_\_

**11. En caso de realizar bloqueos regionales ¿Quién realiza dichos bloqueos?**

- ☐ Anestesista.
- ☐ Neurocirujano.
- ☐ Indistintamente

**12. ¿Usa de forma sistemática algún tratamiento alternativo a la administración intravenosa de fármacos postoperatoriamente?** Si elige la opción otro concréteela en el espacio.

- ☐ Bloqueos nerviosos tronculares al finalizar la cirugía.
- ☐ Infiltración de la incisión
- ☐ Frio local
- ☐ Acupuntura
- ☐ No
- ☐ Otros: \_\_\_\_\_

**13. ¿En cuánto cifraría la cronificación del dolor postcraneotomía en su centro?**

- ☐ No lo tenemos cuantificado
- ☐ Menos del 10% de los casos
- ☐ Entre el 10 y el 25%.
- ☐ Entre el 26 y el 50%
- ☐ Más del 50%

**14 ¿Cree que el tratamiento intraoperatorio del dolor asociado a craneotomía determina su cronificación?**

- ☐ Si
- ☐ No

## Náuseas y Vómitos postoperatorios (NVPO)

15. ¿En cuánto cifra la incidencia de NVPO tras craneotomía en su centro?

- ☐ No está cuantificado
- ☐ 0-25%.
- ☐ 26-50%.
- ☐ 51-75%
- ☐ 76-100%.

16. ¿Usa escalas sistemáticamente para estratificar el riesgo de NVPO?

- ☐ Si
- ☐ No, solo ocasionalmente
- ☐ No, siempre uso tratamiento preventivo.

17. ¿Cuál es la escala que usa? *Si usa otra escala diferente a las mencionadas, concrete cual*

- ☐ Escala de Palazzo
- ☐ Escala de Koivuranta.
- ☐ Escala de Apfel.
- ☐ Escala Sinclair.
- ☐ Otros: \_\_\_\_\_

18. ¿Considera que todas las craneotomías precisan profilaxis multimodal por el riesgo que induce las NVPO en paciente neuroquirúrgico?

- ☐ Si
- ☐ No

19. ¿Usa tratamiento profiláctico multimodal sistemáticamente frente a la aparición de NVPO en craneotomía?

- ☐ Si
- ☐ No

20. ¿Considera que se debe administrar profilaxis multimodal solo en craneotomías con riesgo elevado de NVPO? *Por ejemplo, fosa posterior*

- ☐ Si
- ☐ No

21. ¿Usa tratamiento profiláctico únicamente en las craneotomías que considera de alto riesgo de NVPO?

- ☐ Si
- ☐ No

**22 ¿Qué fármacos usa como profilaxis antiemética?**

|                | Prequirúrgico | Inducción anestésica | Educción anestésica | En la unidad de destino |
|----------------|---------------|----------------------|---------------------|-------------------------|
| Dexametasona   |               |                      |                     |                         |
| Metoclopramida |               |                      |                     |                         |
| Domperidona    |               |                      |                     |                         |
| Ondansetron    |               |                      |                     |                         |
| Palonosetron   |               |                      |                     |                         |
| Tropisetron    |               |                      |                     |                         |
| Apretibant     |               |                      |                     |                         |
| Fosapretibant  |               |                      |                     |                         |
| Nabilone       |               |                      |                     |                         |
| Droperidol     |               |                      |                     |                         |
| Otros          |               |                      |                     |                         |

**23. Fármaco de preferencia según el momento de administración. Señale el fármaco que administra de forma preferente según la etapa.**

|                | Prequirúrgico | Inducción anestésica | Educción anestésica | En la unidad de destino |
|----------------|---------------|----------------------|---------------------|-------------------------|
| Dexametasona   |               |                      |                     |                         |
| Metoclopramida |               |                      |                     |                         |
| Domperidona    |               |                      |                     |                         |
| Ondansetron    |               |                      |                     |                         |
| Palonosetron   |               |                      |                     |                         |
| Tropisetron    |               |                      |                     |                         |
| Apretibant     |               |                      |                     |                         |
| Fosapretibant  |               |                      |                     |                         |
| Nabilone       |               |                      |                     |                         |
| Droperidol     |               |                      |                     |                         |
| Otros          |               |                      |                     |                         |

**24. En el caso de aparecer NVPO en pacientes sometidos a craneotomía ¿Qué estrategia usa?**

- Antagonistas de la serotonina, independientemente del tipo de profilaxis y del tiempo transcurrido.
- Dexametasona independientemente del tipo de profilaxis y del tiempo transcurrido
- Procinéticos.
- Cambio de familia farmacológica, respecto a profilaxis.
- Uso terapias alternativas.

**25. En el caso de usar terapias alternativas ¿Cuales usa?**

- Acupuntura
- Electroacupuntura (estimulación eléctrica del punto P6).
- Acupresión
- Parches transdérmicos de escopolamina
- Propofol a dosis de 20 mg.
- No uso terapias alternativas
- Otros: \_\_\_\_\_

## Profilaxis anticomicial.

**26. ¿Administra de modo sistemático profilaxis anticomicial a los tumores cerebrales supratentoriales independientemente de que hayan presentado con anterior a la cirugía?**

- ☐ Si
- ☐ No

**27-En el caso de que no sea de forma sistemática, ¿Cuales son los factores que le inducen a su administración? Si son varias las razones, marque otros y señale sus números**

- ☐ Tipo histopatológico de presunción de la lesión.
- ☐ Situación anatómica de la lesión.
- ☐ Solicitud por parte del equipo quirúrgico.
- ☐ Historia de crisis en relación con el tumor.
- ☐ Monitorización intraoperatoria.
- ☐ Otros: \_\_\_\_\_

**28. ¿Cuál es la terapia usada como profilaxis de preferencia? Asigne números consecutivos en orden de preferencia. Solo asigne orden de preferencia a los que use habitualmente.**

|                 | 1 | 2 | 3 | 4 | 6 |
|-----------------|---|---|---|---|---|
| Fenitoina       |   |   |   |   |   |
| Levetiracetam   |   |   |   |   |   |
| Ácido Valproico |   |   |   |   |   |
| Fenobarbital    |   |   |   |   |   |
| Lacosamida      |   |   |   |   |   |
| Otros           |   |   |   |   |   |

**29. Si en la tabla anterior ha contestado otro, señale cual.**

---

**30. ¿Usa algún tipo de monitorización para diagnosticar crisis intraoperatorias?**

- ☐ Si
- ☐ No

**31 ¿Cual es el monitor usado por usted?**

- ☐ EEG
- ☐ BIS
- ☐ Entropía
- ☐ Sedline
- ☐ No uso monitorización neurofisiológica
- ☐ Otros: \_\_\_\_\_

**32. En el caso de un paciente que ha debutado con crisis:**

- ☐ Mantiene tratamiento oral durante el perioperatorio.
- ☐ Sustituye por tratamiento intravenoso durante todo el perioperatorio.
- ☐ Mantiene hasta la mañana quirúrgica el tratamiento oral y sustituye por tratamiento intravenoso en el postoperatorio.
- ☐ Otros: \_\_\_\_\_

**33. ¿Qué duración mantiene el tratamiento anticomicial postcirugía?**

- ☐ Una semana
- ☐ Un año
- ☐ Otros:

## Uso de la dexametasona

### 34. ¿Administra dexametasona en todas las craneotomías?

- ☐ Sistemáticamente
- ☐ Casi siempre
- ☐ Muchas veces
- ☐ Ocasionalmente
- ☐ Nunca

### 35. ¿Cuál es el fin principal con el que usted administra este fármaco?

- ☐ Antiemético
- ☐ Antiinflamatorio (antiedema).
- ☐ Analgésico.
- ☐ Otros: \_\_\_\_\_

### 36. ¿Qué factores hacen que administre dexametasona con fines antiedema? *Si son varios señale otros y añada sus números*

- ☐ Tipo de patología
- ☐ Localización de la lesión
- ☐ Pruebas de imagen.
- ☐ Historia del paciente (consumo preoperatorio pautado por otros especialistas).
- ☐ Otros: \_\_\_\_\_

### 37. Cuando decide la administración de dexametasona intraoperatoria ¿Cuál es la dosis habitual usada por usted?

- ☐ 4mg.
- ☐ 4-10mg.
- ☐ 0,1 mg/Kg.
- ☐ 0,1 mg/Kg con límite de 10.
- ☐ Más de 0,1 mg/Kg.

### 38. ¿Qué dosis diaria máxima de dexametasona administra en patología tumoral?

- ☐ No administro dexametasona.
- ☐ Dosis intraoperatoria únicamente.
- ☐ Dosis intraoperatoria y administración postoperatoria pautada. (señale la dosis postoperatoria habitual)
- ☐ Otros: \_\_\_\_\_

### 3. ¿Monitoriza la glucemia en los pacientes a los que administra dexametasona?

- ☐ Si
- ☐ No



**40. ¿En el caso de monitorizarla, durante cuánto tiempo?**

- ☐ Intraoperatoriamente.
- ☐ 12 horas
- ☐ 24 horas
- ☐ Durante la duración del tratamiento
- ☐ Otros:

**41. Intraoperatoriamente, ¿Con qué frecuencia monitoriza la glucemia en los pacientes a los que administra dexametasona?**

- ☐ Horaria
- ☐ Cada 2 horas
- ☐ Cada 3 horas
- ☐ Cada 4 horas
- ☐ Al principio y al final de la operación, independientemente de la duración.
- ☐ Otros. \_\_\_\_\_

**42. Postoperatoriamente, ¿Con qué frecuencia monitoriza la glucemia en los pacientes a los que administra dexametasona?**

- ☐ No la monitorizo postoperatoriamente, solo por la administración de dexametasona.
- ☐ Horaria.
- ☐ Cada 2 horas.
- ☐ Cada 3 horas
- ☐ Cada 4 horas
- ☐ Cada turno (cada 8 horas)
- ☐ Diaria

## Circuitos de Atención y tratamiento Postoperatorio para las patologías e intervenciones neuroquirúrgicas más prevalentes.

*Todas las preguntas referidas a procedimientos quirúrgicos programados con Anestesia.*

### 43. ¿Dispone su hospital de protocolos específicos para el circuito postoperatorio de los pacientes neuroquirúrgicos?

- ☐ Si
- ☐ No

### 44. ¿Quién ha diseñado los protocolos? Si la respuesta es más de uno señale en otros sus números.

*En el caso de que su respuesta no este entre las opciones señale otros y concrétele*

- ☐ 1 Anestesiólogo
- ☐ 2 Cirujano
- ☐ 3 Intensivista
- ☐ Otros: \_\_\_\_\_

### 45. ¿En función de qué criterios han diseñado los protocolos? Si la respuesta es más de uno marque otros y señale sus números. Si su respuesta no está entre las propuestas marque otros y concrétele.

- ☐ 1 Riesgo preoperatorio del paciente (comorbilidad)
- ☐ 2 Tipo de intervención
- ☐ 3 Duración de la intervención
- ☐ 4 Aparición de complicaciones intraoperatorias
- ☐ 5 Previsión de complicaciones postoperatorias
- ☐ 6 Capacidad de ventilación espontánea
- ☐ Otros: \_\_\_\_\_

### 46 ¿Quién decide dónde va el paciente después de la intervención quirúrgica?

- ☐ Anestesiólogo
- ☐ Cirujano
- ☐ Intensivista
- ☐ Otros: \_\_\_\_\_

### 47. Marque las áreas que utiliza para enviar los pacientes neuroquirúrgicos una vez

**finalizada la intervención.** *Considere todo tipo de intervención de neurocirugía programadas con anestesia. Si la respuesta es múltiple señale otros e indique sus números.*

- ☐ 1. Unidad de recuperación postanestésica o área de despertar (URPA): [lugar próximo al quirófano donde se despiertan los pacientes tras la cirugía programada]
- ☐ 2. Unidad de Cuidados Intermedios: (unidad ajena al área quirúrgica, con opción a ingresos >24 horas, monitorización invasiva, NO ventilación mecánica; ratio enfermería 1:4)
- ☐ 3. Unidad de Cuidados Intensivos: [unidad ajena al área quirúrgica, con opción a ingresos >24 horas, monitorización invasiva, opción de ventilación mecánica; ratio enfermería 1:2]
- ☐ 4. Sala de Hospitalización convencional
- ☐ 5. Unidad de Estancia Corta: [hospitalización convencional <24 horas]
- ☐ 6. Alta directa: Sin hospitalización; cirugía ambulatoria
- ☐ Otros: \_\_\_\_\_

**48 ¿Realiza actos anestésicos para procedimientos neuroquirúrgicos ambulatorios?** *Sin noche*

- ☐ Si
- ☐ No

**49. En el caso de realizar procedimientos neuroquirúrgicos ambulatorios bajo anestesia.**

**¿Cuáles son los que realiza?** *Si son varios, elija otros y señale sus números. Si su respuesta no está en la lista, elija otros y concrétele.*

- ☐ Compresión nervio periférico
- ☐ Hernia discal lumbosacra 1 nivel
- ☐ Hernia discal lumbosacra  $\geq 2$  niveles
- ☐ Artrodesis lumbosacra
- ☐ Otros:

**50. ¿Quién pauta el tratamiento postoperatorio inmediato del paciente neuroquirúrgico?** *Si son varios, elija otros y señale sus números. Si su respuesta no está en la lista, elija otros y concrétele.*

- ☐ Anestesiólogo en quirófano
- ☐ Neurocirujano que lo ha intervenido
- ☐ Médico de sala
- ☐ Médico de la UCI (anestesiólogo o intensivista según el centro)
- ☐ Otros:

**51 ¿Tiene estandarizada la extubación del paciente en quirófano al finalizar la cirugía?** *En los casos en que no se presente patología de riesgo, ni complicaciones*

- ☐ Si
- ☐ No

**52. Indicaciones de trasladar intubado a un paciente neuroquirúrgico.** *Si son varios, elija otros y señale sus números. Si su respuesta no está en la lista, elija otros y concrétele.*

- ☐ 1. Antecedentes de riesgo cardiopulmonar
- ☐ 2. Depresión estado consciencia previo a la cirugía (precisa estímulo doloroso para abrir ojos)
- ☐ 3. Tumores de fosa posterior
- ☐ 4. Sangrado intraoperatorio  $> 1L$
- ☐ 5. Crisis comicial intraoperatoria
- ☐ 6. Embolia aérea grave
- ☐ 7. Traslado a UCI
- ☐ Otros: \_\_\_\_\_

**53. Unidad de recuperación anestésica URPA ¿Dispone de médico responsable específico?**

- ☐ Si
- ☐ No

**54. En caso afirmativo, ¿Qué especialista es el responsable de la URPA?** *No contestar si en la pregunta anterior contestó no*

- ☐ Anestesiólogo
- ☐ Intensivista
- ☐ Cirujano
- ☐ Traumatólogo
- ☐ Otros: \_\_\_\_\_

**55. ¿Qué especialista es el responsable de la Unidad de Intermedios?** *Entendiendo como tal, unidad ajena al área quirúrgica, con opción a ingresos >24 horas, monitorización invasiva, NO ventilación mecánica; ratio enfermería 1:4*

- ☐ Anestesiólogo
- ☐ Intensivista
- ☐ Cirujano
- ☐ Traumatólogo
- ☐ Otros:

**56. ¿Qué especialista es el responsable de la UCI?** *Entendiendo por tal, unidad ajena al área quirúrgica, con opción a ingresos >24 horas, monitorización invasiva, opción de ventilación mecánica; ratio enfermería 1:2*

- ☐ Anestesiólogo
- ☐ Intensivista
- ☐ Cirujano
- ☐ Traumatólogo
- ☐ Otros:

**57. ¿Dispone de enfermería en la URPA formada para el control postoperatorio del paciente neuroquirúrgico específicamente?**

- ☐ Si
- ☐ No

**58. ¿Dispone de protocolos de enfermería en la URPA para examen neurológico postoperatorio?**

- ☐ Si
- ☐ No

**59. ¿Dispone de protocolos de enfermería en la Unidad de Intermedios para examen neurológico postoperatorio?**

- ☐ Si
- ☐ No

**60. ¿Dispone de protocolos de enfermería en la UCI para examen neurológico postoperatorio?**

- ☐ Si
- ☐ No

**61. ¿Dónde envía el paciente una vez finalizada la intervención?** *En los casos no patología asociada de riesgo, no complicaciones durante el procedimiento.*

|                                                                                                                | Alta directa | Unidad de corta estancia (sin noche) | Sala de hospitalización (con noche/s) | Unidad de recuperación postanestésica o área de despertar (URPA) | Unidad de cuidados intermedios | Unidad de cuidados intensivos |
|----------------------------------------------------------------------------------------------------------------|--------------|--------------------------------------|---------------------------------------|------------------------------------------------------------------|--------------------------------|-------------------------------|
| <b>Hernia discal lumbar simple</b> (1 nivel)                                                                   |              |                                      |                                       |                                                                  |                                |                               |
| <b>Patología lumbar compleja</b> (hernia discal varios niveles, estenosis canal, artrodesis).                  |              |                                      |                                       |                                                                  |                                |                               |
| <b>Válvula derivación ventrículo peritoneal, generador subcutáneo, neuralgia trigémino</b> (no fosa posterior) |              |                                      |                                       |                                                                  |                                |                               |
| <b>Patología cervical no fosa posterior</b> (hernia discal, artrodesis)                                        |              |                                      |                                       |                                                                  |                                |                               |
| <b>Cirugía funcional</b> (epilepsia, Parkinson)                                                                |              |                                      |                                       |                                                                  |                                |                               |
| <b>Hipofisectomía de bajo riesgo</b> (microadenoma, no patología asociada, edad joven)                         |              |                                      |                                       |                                                                  |                                |                               |
| <b>Hipofisectomía de alto riesgo</b> (Cushing, macroadenomas gigantes, comorbilidad, edad avanzada)            |              |                                      |                                       |                                                                  |                                |                               |
| <b>Fistula de LCR</b>                                                                                          |              |                                      |                                       |                                                                  |                                |                               |
| <b>Biopsia cerebral supratentorial</b>                                                                         |              |                                      |                                       |                                                                  |                                |                               |
| <b>Biopsia cerebral fosa posterior</b>                                                                         |              |                                      |                                       |                                                                  |                                |                               |
| <b>Cirugía supratentorial</b>                                                                                  |              |                                      |                                       |                                                                  |                                |                               |
| <b>Neuroendoscopia</b>                                                                                         |              |                                      |                                       |                                                                  |                                |                               |
| <b>Tumor de clivus o base de cráneo</b>                                                                        |              |                                      |                                       |                                                                  |                                |                               |
| <b>Aneurisma o MAV cerebral</b> (en frío, no HSA)                                                              |              |                                      |                                       |                                                                  |                                |                               |

**62. ¿Cuál es la estancia media del paciente en la Unidad de recuperación postanestésica o área de despertar (URPA) antes de ser trasladado a la sala de hospitalización convencional?**

*En los casos no patología asociada de riesgo, no complicaciones durante el procedimiento.*

|                                                                                                         | No pasa por Urpa | ≤ 1 hora | Entre 1 y 2 horas | Entre 2 y 3 horas | Entre 3 y 4 horas | Más de 4 h pero no pasa la noche en URPA | Más de 4h y pasa la noche en URPA |
|---------------------------------------------------------------------------------------------------------|------------------|----------|-------------------|-------------------|-------------------|------------------------------------------|-----------------------------------|
| Hernia discal lumbar simple (1 nivel)                                                                   |                  |          |                   |                   |                   |                                          |                                   |
| Patología lumbar compleja (hernia discal varios niveles, estenosis canal, artrodesis).                  |                  |          |                   |                   |                   |                                          |                                   |
| Válvula derivación ventrículo peritoneal, generador subcutáneo, neuralgia trigémino (no fosa posterior) |                  |          |                   |                   |                   |                                          |                                   |
| Patología cervical no fosa posterior (hernia discal, artrodesis)                                        |                  |          |                   |                   |                   |                                          |                                   |
| Cirugía funcional (epilepsia, Parkinson)                                                                |                  |          |                   |                   |                   |                                          |                                   |
| Hipofisectomía de bajo riesgo (microadenoma, no patología asociada, edad joven)                         |                  |          |                   |                   |                   |                                          |                                   |
| Hipofisectomía de alto riesgo (Cushing, macroadenomas gigantes, comorbilidad, edad avanzada)            |                  |          |                   |                   |                   |                                          |                                   |
| Fistula de LCR                                                                                          |                  |          |                   |                   |                   |                                          |                                   |
| Biopsia cerebral supratentorial                                                                         |                  |          |                   |                   |                   |                                          |                                   |
| Biopsia cerebral fosa posterior                                                                         |                  |          |                   |                   |                   |                                          |                                   |
| Cirugía supratentorial                                                                                  |                  |          |                   |                   |                   |                                          |                                   |
| Neuroendoscopia                                                                                         |                  |          |                   |                   |                   |                                          |                                   |
| Tumor de clivus o base de cráneo                                                                        |                  |          |                   |                   |                   |                                          |                                   |
| Aneurisma o MAV cerebral (en frío, no HSA)                                                              |                  |          |                   |                   |                   |                                          |                                   |

**63. ¿Cuál es la estancia media del paciente en la Unidad de INTERMEDIOS antes de ser trasladado a la sala de hospitalización convencional?** *En los casos no patología asociada de riesgo, no complicaciones durante el procedimiento.*

|                                                                                                         | No pasa por intermedios | 24 horas | 24-48 horas | > 48 horas |
|---------------------------------------------------------------------------------------------------------|-------------------------|----------|-------------|------------|
| Hernia discal lumbar simple (1 nivel)                                                                   |                         |          |             |            |
| Patología lumbar compleja (hernia discal varios niveles, estenosis canal, artrodesis).                  |                         |          |             |            |
| Válvula derivación ventrículo peritoneal, generador subcutáneo, neuralgia trigémino (no fosa posterior) |                         |          |             |            |
| Patología cervical no fosa posterior (hernia discal, artrodesis)                                        |                         |          |             |            |
| Cirugía funcional (epilepsia, Parkinson)                                                                |                         |          |             |            |
| Hipofisectomía de bajo riesgo (microadenoma, no patología asociada, edad joven)                         |                         |          |             |            |
| Hipofisectomía de alto riesgo (Cushing, macroadenomas gigantes, comorbilidad, edad avanzada)            |                         |          |             |            |
| Fistula de LCR                                                                                          |                         |          |             |            |
| Biopsia cerebral supratentorial                                                                         |                         |          |             |            |
| Biopsia cerebral fosa posterior                                                                         |                         |          |             |            |
| Cirugía supratentorial                                                                                  |                         |          |             |            |
| Neuroendoscopia                                                                                         |                         |          |             |            |
| Tumor de clivus o base de cráneo                                                                        |                         |          |             |            |
| Aneurisma o MAV cerebral (en frío, no HSA)                                                              |                         |          |             |            |

**64. ¿Cuál es la estancia media del paciente en la Unidad de INTENSIVOS antes de ser trasladado a la sala de hospitalización convencional?**

|                                                                                                         | No pasa por intensivos | 24 horas | 24-48 horas | > 48 horas |
|---------------------------------------------------------------------------------------------------------|------------------------|----------|-------------|------------|
| Hernia discal lumbar simple (1 nivel)                                                                   |                        |          |             |            |
| Patología lumbar compleja (hernia discal varios niveles, estenosis canal, artrodesis).                  |                        |          |             |            |
| Válvula derivación ventrículo peritoneal, generador subcutáneo, neuralgia trigémino (no fosa posterior) |                        |          |             |            |
| Patología cervical no fosa posterior (hernia discal, artrodesis)                                        |                        |          |             |            |
| Cirugía funcional (epilepsia, Parkinson)                                                                |                        |          |             |            |
| Hipofisectomía de bajo riesgo (microadenoma, no patología asociada, edad joven)                         |                        |          |             |            |
| Hipofisectomía de alto riesgo (Cushing, macroadenomas gigantes, comorbilidad, edad avanzada)            |                        |          |             |            |
| Fistula de LCR                                                                                          |                        |          |             |            |
| Biopsia cerebral supratentorial                                                                         |                        |          |             |            |
| Biopsia cerebral fosa posterior                                                                         |                        |          |             |            |
| Cirugía supratentorial                                                                                  |                        |          |             |            |
| Neuroendoscopia                                                                                         |                        |          |             |            |
| Tumor de clivus o base de cráneo                                                                        |                        |          |             |            |
| Aneurisma o MAV cerebral (en frío, no HSA)                                                              |                        |          |             |            |

**65 ¿Cuál es la estancia media del paciente en el hospital, desde su ingreso hasta el alta?**

|                                                                                                         | 1 día (no noche) | 2 días (1 noche) | 3 días (2 noche) | Entre 3 y 7 días | Más de una semana |
|---------------------------------------------------------------------------------------------------------|------------------|------------------|------------------|------------------|-------------------|
| Hernia discal lumbar simple (1 nivel)                                                                   |                  |                  |                  |                  |                   |
| Patología lumbar compleja (hernia discal varios niveles, estenosis canal, artrodesis).                  |                  |                  |                  |                  |                   |
| Válvula derivación ventrículo peritoneal, generador subcutáneo, neuralgia trigémino (no fosa posterior) |                  |                  |                  |                  |                   |
| Patología cervical no fosa posterior (hernia discal, artrodesis)                                        |                  |                  |                  |                  |                   |
| Cirugía funcional (epilepsia, Parkinson)                                                                |                  |                  |                  |                  |                   |
| Hipofisectomía de bajo riesgo (microadenoma, no patología asociada, edad joven)                         |                  |                  |                  |                  |                   |
| Hipofisectomía de alto riesgo (Cushing, macroadenomas gigantes, comorbilidad, edad avanzada)            |                  |                  |                  |                  |                   |
| Fistula de LCR                                                                                          |                  |                  |                  |                  |                   |
| Biopsia cerebral supratentorial                                                                         |                  |                  |                  |                  |                   |
| Biopsia cerebral fosa posterior                                                                         |                  |                  |                  |                  |                   |
| Cirugía supratentorial                                                                                  |                  |                  |                  |                  |                   |
| Neuroendoscopia                                                                                         |                  |                  |                  |                  |                   |
| Tumor de clivus o base de cráneo                                                                        |                  |                  |                  |                  |                   |
| Aneurisma o MAV cerebral (en frío, no HSA)                                                              |                  |                  |                  |                  |                   |

**66 ¿Qué exploraciones neurológicas y escalas de valoración neurológica se aplican sistemáticamente a los pacientes postoperados de una CIRUGIA LUMBAR??**

- Nivel de conciencia
- Glasgow Coma Score
- Escala de Ramsay
- Tamaño y reactividad pupilar
- Orientación
- Lenguaje
- Fuerza
- Sensibilidad
- Escala Canadiense
- Escala NiHSS
- Escala del delirio
- Otras escalas
- BIS
- SrO2
- Otro monitor neurológico.

**67. ¿Qué exploraciones neurológicas y escalas de valoración neurológica se aplican sistemáticamente a los pacientes postoperados de una CIRUGIA CERVICAL?**

- Nivel de conciencia
- Glasgow Coma Score
- Escala de Ramsay
- Tamaño y reactividad pupilar
- Orientación
- Lenguaje
- Fuerza
- Sensibilidad
- Escala Canadiense
- Escala NiHSS
- Escala del delirio
- Otras escalas
- BIS
- SrO2
- Otro monitor neurológico



**68. ¿Qué exploraciones neurológicas y escalas de valoración neurológica se aplican sistemáticamente a los pacientes postoperados de una CIRUGIA SUPRATENTORIAL??**

- Nivel de conciencia
- Glasgow Coma Score
- Escala de Ramsay
- Tamaño y reactividad pupilar
- Orientación
- Lenguaje
- Fuerza
- Sensibilidad
- Escala Canadiense
- Escala NiHSS
- Escala del delirio
- Otras escalas
- BIS
- SrO2
- Otro monitor neurológico

**69 ¿Qué exploraciones neurológicas y escalas de valoración neurológica se aplican sistemáticamente a los pacientes postoperados de una CIRUGIA INFRATENTORIAL?**

- Nivel de conciencia
- Glasgow Coma Score
- Escala de Ramsay
- Tamaño y reactividad pupilar
- Orientación
- Lenguaje
- Fuerza
- Sensibilidad
- Escala Canadiense
- Escala NiHSS
- Escala del delirio
- Otras escalas
- BIS
- SrO<sub>2</sub>
- Otro monitor neurológico
